# Supplementary material for: EPRS is a critical regulator of cell proliferation and estrogen signaling in ER+ breast cancer
Source: PubMed Central journal article supplement (PMC5342500; doi:10.18632/oncotarget.11870), 2016-09-06
Supplement: oncotarget-07-69592-s001.pdf [file oncotarget-07-69592-s001.pdf]

# EPRS is a critical regulator of cell proliferation and estrogen signaling in ER+ breast cancer

## Supplementary Materials

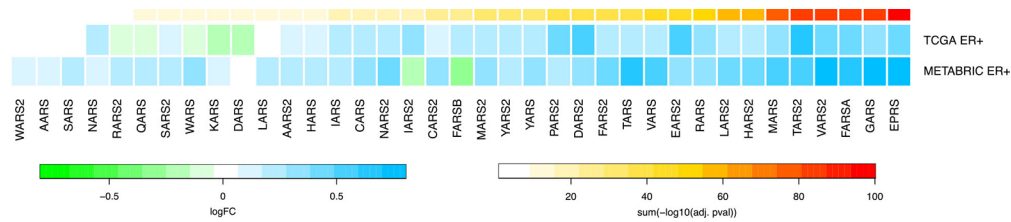

**Supplementary Figure S1: Aminoacyl tRNA synthetase expression in ER+ breast cancer.** Differential expression of ARS genes in ER+ breast tumors compared to adjacent normal samples in TCGA and METABRIC cohorts. Genes are ordered by the sum of their  $-\log_{10}(\text{adjusted } p \text{ values})$  from each individual dataset.

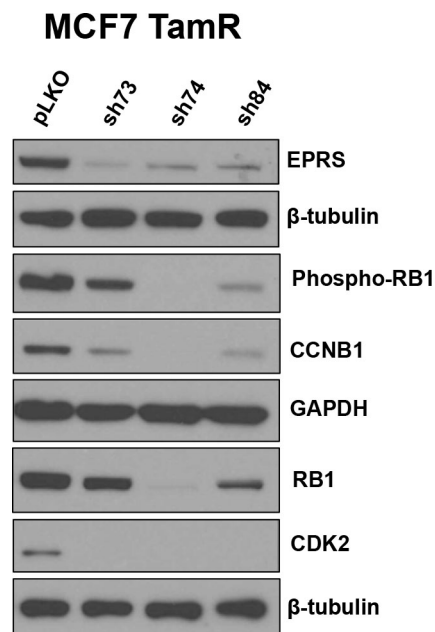

**Supplementary Figure S2: EPRS shRNA downregulates cell cycle proteins in MCF7 TamR cells.** Representative western blot of shEPRS-induced downregulation of cell cycle proteins in MCF7 TamR cells.

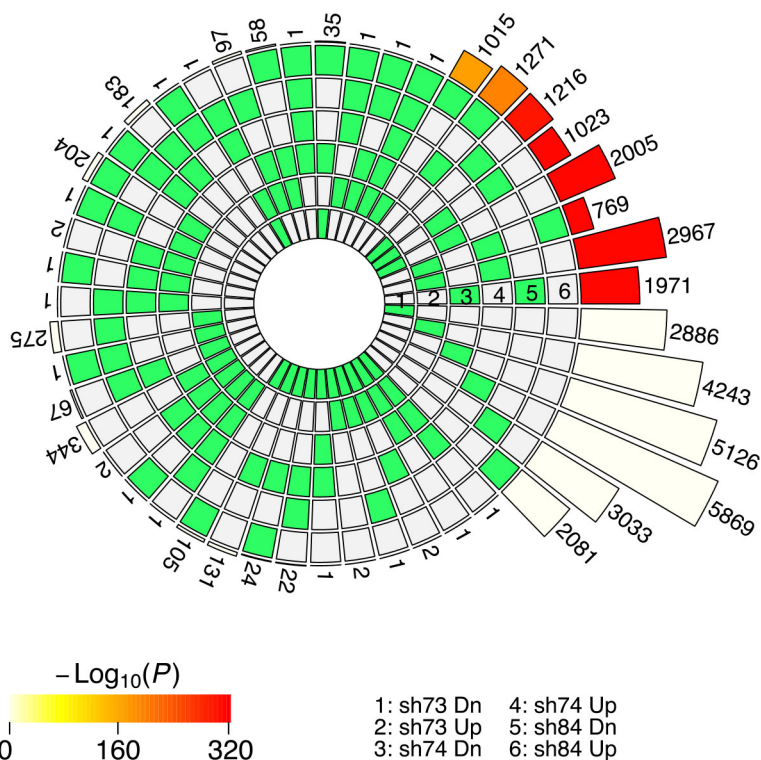

**Supplementary Figure S3: shEPRS RNA-seq.** *EPRS* shRNA RNA-sequencing differentially-expressed genes (FDR < 0.05, FC > 1.3). Overlaps between shRNAs are tested and visualized using the SuperExactTest.

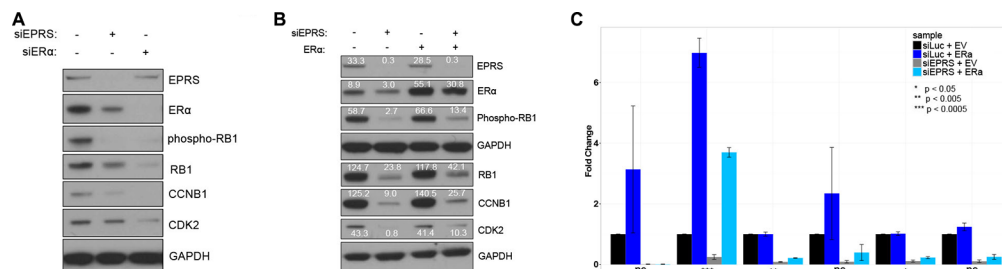

**Supplementary Figure S4: *EPRS* affects proliferation partially through *ESR1*.** (A) *ESR1* knockdown phenocopies *EPRS* knockdown. Representative immunoblot shown. (B and C) Rescue of *ESR1* expression partially rescues siEPRS-induced downregulation of cell cycle proteins. Error bars represent SEM. siLuc: luciferase-targeting siRNA (control). siEPRS: pool of four unique siEPRS-targeting siRNAs.

**Supplementary Table S1: Tamoxifen response and nonresponse genes.**

See Supplementary\_Table\_S1

**Supplementary Table S2: EES keydrivers. “1” indicates affirmative, “0” indicates negative. “Survival.cox” and “survival.km” indicate Cox regression and Kaplan-Meier, respectively, *p*-values combined from TCGA, METABRIC, Miller and Wang datasets using Fisher’s method.**

See Supplementary\_Table\_S2
